# Supplementary material
Source: PubMed Central journal article supplement (PMC6014877)
Supplement: NIHMS951382-supplement.pdf [file NIHMS951382-supplement.pdf]

**Appendix**  
**Association Between Number of Preventive Care Guidelines and Preventive Care Utilization by Patients**  
**Taksler et al.**

**Appendix Table 1.** Adjusted Rate Ratios and AORs<sup>a</sup>

| Variable                                                   | Number of guideline-recommended preventive services |                      |                      |                      |                       |                      | p for trend |
|------------------------------------------------------------|-----------------------------------------------------|----------------------|----------------------|----------------------|-----------------------|----------------------|-------------|
|                                                            | 1                                                   | 2                    | 3                    | 4                    | 5                     | ≥6                   |             |
| Utilization of any single preventive service, ARR (95% CI) |                                                     |                      |                      |                      |                       |                      |             |
| Overall                                                    | ref                                                 | 0.74<br>(0.73, 0.75) | 0.64<br>(0.63, 0.65) | 0.58<br>(0.58, 0.59) | 0.53<br>(0.52, 0.54)  | 0.51<br>(0.49, 0.52) | <0.001      |
| By number of disease risk factors                          |                                                     |                      |                      |                      |                       |                      |             |
| 0                                                          | ref                                                 | 0.74<br>(0.73, 0.76) | 0.68<br>(0.65, 0.70) | 0.54<br>(0.51, 0.57) | –                     | –                    | <0.001      |
| 1                                                          | –                                                   | ref                  | 0.82<br>(0.81, 0.84) | 0.75<br>(0.73, 0.78) | 0.59<br>(0.56, 0.62)  | –                    | <0.001      |
| 2                                                          | –                                                   | –                    | ref                  | 0.85<br>(0.83, 0.86) | 0.76<br>(0.74, 0.79)  | 0.61<br>(0.58, 0.64) | <0.001      |
| ≥3                                                         | –                                                   | –                    | –                    | ref                  | 0.886<br>(0.83, 0.89) | 0.80<br>(0.76, 0.85) | <0.001      |
| By specific disease risk factors <sup>b</sup>              |                                                     |                      |                      |                      |                       |                      |             |
| Current smoker                                             | –                                                   | ref                  | 0.95<br>(0.90, 1.00) | 0.99<br>(0.93, 1.05) | 0.99<br>(0.91, 1.07)  | 1.06<br>(0.97, 1.17) | 0.075       |
| Obese                                                      | –                                                   | ref                  | 0.94<br>(0.92, 0.96) | 0.93<br>(0.90, 0.96) | 0.87<br>(0.84, 0.91)  | 0.86<br>(0.82, 0.91) | <0.001      |
| Diabetes                                                   | –                                                   | ref                  | 0.79<br>(0.75, 0.84) | 0.73<br>(0.68, 0.77) | 0.67<br>(0.62, 0.73)  | 0.63<br>(0.57, 0.70) | <0.001      |
| Hypertension                                               | –                                                   | ref                  | 0.75<br>(0.73, 0.77) | 0.63<br>(0.61, 0.65) | 0.55<br>(0.53, 0.57)  | 0.48<br>(0.46, 0.50) | <0.001      |
| Hyperlipidemia                                             | –                                                   | ref                  | 0.86<br>(0.84, 0.88) | 0.81<br>(0.79, 0.83) | 0.77<br>(0.74, 0.80)  | 0.74<br>(0.70, 0.77) | <0.001      |
| Outcome-based services <sup>b</sup>                        | ref                                                 | 1.34<br>(1.31, 1.37) | 1.60<br>(1.55, 1.65) | 1.82<br>(1.72, 1.92) | 1.78<br>(1.50, 2.11)  | –                    | <0.001      |
| All outcome-based services except obesity reduction        | ref                                                 | 0.95<br>(0.93, 0.98) | 0.88<br>(0.85, 0.91) | 0.83<br>(0.79, 0.87) | –                     | –                    | <0.001      |
| Receipt-based services <sup>c</sup>                        | ref                                                 | 0.72<br>(0.71, 0.74) | 0.67<br>(0.64, 0.69) | 0.55<br>(0.52, 0.58) | 0.36<br>(0.14, 0.92)  | –                    | <0.001      |
| Utilization of specific preventive services, AOR (95% CI)  |                                                     |                      |                      |                      |                       |                      |             |
| Tobacco cessation                                          | –                                                   | ref                  | 1.02<br>(0.89, 1.18) | 1.05<br>(0.91, 1.21) | 0.93<br>(0.79, 1.10)  | 0.88<br>(0.73, 1.07) | 0.12        |
| Obesity reduction                                          | –                                                   | ref                  | 1.06<br>(1.00, 1.11) | 1.08<br>(1.02, 1.14) | 1.10<br>(1.04, 1.18)  | 1.12<br>(1.04, 1.22) | <0.001      |
| Hypertension control                                       | –                                                   | ref                  | 0.96<br>(0.89, 1.04) | 0.83<br>(0.77, 0.90) | 0.72<br>(0.65, 0.78)  | 0.63<br>(0.57, 0.69) | <0.001      |
| Lipids reduction                                           | –                                                   | ref                  | 0.98                 | 0.95                 | 0.85                  | 0.72                 | <0.001      |

**Appendix**  
**Association Between Number of Preventive Care Guidelines and Preventive Care Utilization by Patients**  
**Taksler et al.**

|                                     |     |      |              |              |              |              |              |
|-------------------------------------|-----|------|--------------|--------------|--------------|--------------|--------------|
|                                     |     |      | (0.93, 1.04) | (0.89, 1.01) | (0.79, 0.91) | (0.65, 0.78) |              |
| Glycemic control                    | –   | ref  | 0.89         | 0.88         | 0.78         | 0.63         | <0.001       |
|                                     |     |      | (0.73, 1.08) | (0.72, 1.07) | (0.64, 0.96) | (0.50, 0.78) |              |
| Breast cancer screening             | –   | ref  | 0.79         | 0.57         | 0.46         | 0.37         | <0.001       |
|                                     |     |      | (0.72, 0.87) | (0.52, 0.63) | (0.42, 0.51) | (0.33, 0.41) |              |
| Cervical cancer screening           | –   | ref  | 0.97         | 0.98         | 0.85         | 0.63         | <0.001       |
|                                     |     |      | (0.88, 1.08) | (0.88, 1.09) | (0.76, 0.96) | (0.54, 0.73) |              |
| Colorectal cancer screening         | –   | ref  | 0.93         | 0.79         | 0.66         | 0.53         | <0.001       |
|                                     |     |      | (0.89, 0.97) | (0.76, 0.83) | (0.62, 0.70) | (0.49, 0.58) |              |
| Abdominal aortic aneurysm screening | –   | ref  | 0.94         | 1.03         | 0.65         | 0.51         | 0.055        |
|                                     |     |      | (0.75, 1.19) | (0.80, 1.32) | (0.44, 0.95) | (0.25, 1.04) |              |
| Osteoporosis screening              | –   | ref  | 0.71         | 0.52         | 0.34         | 0.20         | <0.001       |
|                                     |     |      | (0.51, 0.99) | (0.37, 0.73) | (0.24, 0.49) | (0.13, 0.30) |              |
| Influenza vaccination               | ref | 1.10 | 1.03         | 0.97         | 0.90         | 0.85         | <0.001       |
|                                     |     |      | (1.06, 1.13) | (0.99, 1.06) | (0.93, 1.01) | (0.85, 0.95) | (0.78, 0.92) |

*Notes:* This table presents the ARRs and AORs that were used to inform the results in Table 3 of the manuscript. The rate of utilization of most preventive services was lower when the number of guideline-recommended preventive services was higher. N=80,773 patients across 390,778 person-years.

<sup>a</sup>Results were adjusted for demographics (sex, race, ethnicity, marital status, health insurance, median household income by race in each patients' Census block group, primary care geographic location, and calendar year). Analyses included a random effect for each patient. SEs were clustered by patient.

<sup>b</sup>Tobacco cessation; control of obesity, hypertension, lipids, and blood glucose.

<sup>c</sup>Screening for breast, cervical, and colorectal cancers, abdominal aortic aneurysm, and osteoporosis.

ARR, adjusted rate ratio

**Appendix**  
**Association Between Number of Preventive Care Guidelines and Preventive Care Utilization by Patients**  
**Taksler et al.**

**Appendix Table 2. Sensitivity Analyses<sup>a</sup>**

| Preventive care utilization                                                                    | Number of guideline-recommended preventive services |                         |                         |                         |                         |                         | p for trend |
|------------------------------------------------------------------------------------------------|-----------------------------------------------------|-------------------------|-------------------------|-------------------------|-------------------------|-------------------------|-------------|
|                                                                                                | 1                                                   | 2                       | 3                       | 4                       | 5                       | ≥6                      |             |
| Utilization of any single preventive service, adjusted rate per 100 eligible services (95% CI) |                                                     |                         |                         |                         |                         |                         |             |
| With obesity control threshold redefined as weight loss ≥10% <sup>b</sup>                      | 38.59<br>(38.07, 39.11)                             | 30.69<br>(30.39, 30.98) | 27.29<br>(27.09, 27.49) | 25.81<br>(25.49, 26.12) | 24.35<br>(23.85, 24.84) | 24.25<br>(23.52, 24.99) | <0.001      |
| Excluding influenza vaccination <sup>c</sup>                                                   | 30.90<br>(30.40, 31.40)                             | 27.38<br>(27.14, 27.62) | 25.62<br>(25.38, 25.87) | 24.35<br>(23.92, 24.78) | 22.80<br>(22.15, 23.44) | 24.47<br>(23.41, 25.53) | <0.001      |
| Including only patients with a primary care visit ≥30 minutes long <sup>c</sup>                | 40.31<br>(39.64, 40.98)                             | 31.84<br>(31.44, 32.24) | 27.36<br>(27.03, 27.70) | 25.49<br>(25.05, 25.92) | 23.51<br>(22.85, 24.17) | 22.05<br>(21.05, 23.04) | <0.001      |
| Including only patients with a primary care visit ≤20 minutes long <sup>d</sup>                | 39.40<br>(38.84, 39.96)                             | 32.25<br>(31.90, 32.60) | 28.69<br>(28.45, 28.93) | 26.61<br>(26.28, 26.94) | 24.81<br>(24.32, 25.31) | 24.66<br>(23.92, 25.40) | <0.001      |
| Including all patients regardless of comorbidity <sup>e</sup>                                  | 42.15<br>(41.68, 42.61)                             | 33.44<br>(33.17, 33.71) | 29.82<br>(29.66, 29.99) | 28.15<br>(27.89, 28.40) | 26.71<br>(26.30, 27.12) | 27.02<br>(26.40, 27.65) | <0.001      |
| By year <sup>f</sup>                                                                           |                                                     |                         |                         |                         |                         |                         |             |
| 2009                                                                                           | 28.95<br>(28.29, 29.63)                             | 26.84<br>(26.26, 27.42) | 24.27<br>(23.79, 24.75) | 22.91<br>(22.37, 23.45) | 21.33<br>(20.60, 22.06) | 21.06<br>(19.95, 22.16) | <0.001      |
| 2010                                                                                           | 31.41<br>(30.69, 32.13)                             | 27.41<br>(26.90, 27.93) | 24.12<br>(23.68, 24.56) | 21.96<br>(21.49, 22.44) | 19.56<br>(18.93, 20.19) | 19.36<br>(18.48, 20.25) | <0.001      |
| 2011                                                                                           | 38.86<br>(38.02, 39.71)                             | 28.95<br>(28.46, 29.43) | 24.77<br>(24.36, 25.19) | 21.97<br>(21.51, 22.43) | 19.27<br>(18.67, 19.87) | 19.13<br>(18.26, 19.99) | <0.001      |
| 2012                                                                                           | 43.72<br>(42.88, 44.57)                             | 32.47<br>(31.99, 32.96) | 27.10<br>(26.69, 27.52) | 23.91<br>(23.44, 24.39) | 22.02<br>(21.37, 22.67) | 22.01<br>(19.16, 21.02) | <0.001      |
| 2013                                                                                           | 48.65<br>(47.82, 49.48)                             | 35.13<br>(34.65, 35.61) | 29.16<br>(28.73, 29.60) | 26.19<br>(25.69, 26.69) | 22.83<br>(22.13, 23.53) | 21.55<br>(20.55, 22.56) | <0.001      |
| 2014                                                                                           | 50.78<br>(49.98, 51.57)                             | 36.67<br>(36.19, 37.15) | 30.93<br>(30.49, 31.38) | 27.80<br>(27.25, 28.34) | 24.93<br>(24.17, 25.69) | 21.77<br>(20.73, 22.81) | <0.001      |
| 2015                                                                                           | 51.97<br>(51.13, 52.82)                             | 40.16<br>(39.63, 40.68) | 34.80<br>(34.31, 35.29) | 31.41<br>(30.82, 31.99) | 28.57<br>(27.73, 29.40) | 26.24<br>(25.08, 27.39) | <0.001      |
| All outcome-based services except obesity reduction                                            | 26.67<br>(26.23, 27.12)                             | 25.83<br>(24.75, 26.91) | 24.33<br>(22.51, 26.15) | 18.96<br>(15.81, 22.11) | –                       | –                       | 0.010       |
| Adjusted rate ratios that were used to inform the above results, ARR (95% CI)                  |                                                     |                         |                         |                         |                         |                         |             |
| Utilization of any single preventive service                                                   |                                                     |                         |                         |                         |                         |                         |             |
| With obesity control threshold redefined as weight loss ≥10% <sup>b</sup>                      | ref                                                 | 0.74<br>(0.73, 0.74)    | 0.67<br>(0.66, 0.68)    | 0.65<br>(0.64, 0.67)    | 0.63<br>(0.61, 0.65)    | 0.64<br>(0.61, 0.66)    | <0.001      |
| Excluding influenza vaccination <sup>c</sup>                                                   | ref                                                 | 0.84<br>(0.83, 0.85)    | 0.77<br>(0.75, 0.79)    | 0.72<br>(0.70, 0.74)    | 0.68<br>(0.65, 0.71)    | 0.60<br>(0.56, 0.63)    | <0.001      |
| Including only patients with a primary care visit ≥30 minutes long <sup>c</sup>                | ref                                                 | 0.75<br>(0.74, 0.76)    | 0.66<br>(0.65, 0.67)    | 0.62<br>(0.61, 0.64)    | 0.58<br>(0.56, 0.61)    | 0.55<br>(0.52, 0.58)    | <0.001      |

**Appendix**  
**Association Between Number of Preventive Care Guidelines and Preventive Care Utilization by Patients**  
**Taksler et al.**

|                                                                                 |     |                      |                      |                      |                      |                      |        |
|---------------------------------------------------------------------------------|-----|----------------------|----------------------|----------------------|----------------------|----------------------|--------|
| Including only patients with a primary care visit ≤20 minutes long <sup>d</sup> | ref | 0.75<br>(0.74, 0.76) | 0.68<br>(0.67, 0.69) | 0.65<br>(0.64, 0.67) | 0.62<br>(0.60, 0.64) | 0.63<br>(0.61, 0.66) | <0.001 |
| Including all patients regardless of comorbidity <sup>e</sup>                   | ref | 0.73<br>(0.73, 0.74) | 0.67<br>(0.66, 0.68) | 0.64<br>(0.63, 0.65) | 0.62<br>(0.61, 0.64) | 0.64<br>(0.62, 0.66) | <0.001 |
| <b>By year<sup>f</sup></b>                                                      |     |                      |                      |                      |                      |                      |        |
| 2009                                                                            | ref | 0.82<br>(0.79, 0.84) | 0.74<br>(0.71, 0.76) | 0.70<br>(0.67, 0.72) | 0.66<br>(0.63, 0.69) | 0.65<br>(0.61, 0.69) | <0.001 |
| 2010                                                                            | ref | 0.80<br>(0.77, 0.82) | 0.71<br>(0.69, 0.73) | 0.65<br>(0.63, 0.67) | 0.59<br>(0.57, 0.61) | 0.59<br>(0.56, 0.62) | <0.001 |
| 2011                                                                            | ref | 0.70<br>(0.69, 0.72) | 0.61<br>(0.59, 0.63) | 0.54<br>(0.53, 0.56) | 0.49<br>(0.47, 0.51) | 0.49<br>(0.46, 0.51) | <0.001 |
| 2012                                                                            | ref | 0.72<br>(0.70, 0.74) | 0.61<br>(0.59, 0.62) | 0.54<br>(0.53, 0.56) | 0.50<br>(0.48, 0.52) | 0.47<br>(0.44, 0.49) | <0.001 |
| 2013                                                                            | ref | 0.70<br>(0.68, 0.71) | 0.59<br>(0.57, 0.60) | 0.54<br>(0.52, 0.55) | 0.47<br>(0.45, 0.49) | 0.45<br>(0.43, 0.48) | <0.001 |
| 2014                                                                            | ref | 0.69<br>(0.68, 0.71) | 0.59<br>(0.58, 0.61) | 0.54<br>(0.53, 0.55) | 0.49<br>(0.47, 0.50) | 0.43<br>(0.41, 0.45) | <0.001 |
| 2015                                                                            | ref | 0.75<br>(0.73, 0.76) | 0.66<br>(0.64, 0.67) | 0.60<br>(0.59, 0.62) | 0.55<br>(0.53, 0.57) | 0.51<br>(0.49, 0.54) | <0.001 |

*Notes:* Sensitivity analyses were consistent with results presented in Table 3 of the manuscript.

<sup>a</sup>Results were adjusted for demographics (sex, race, ethnicity, marital status, health insurance, median household income by race in each patients' Census block group, primary care geographic location and calendar year). Analyses included a random effect for each patient. SEs were clustered by patient.

<sup>b</sup>78,141 patients across 334,181 person-years.

<sup>c</sup>52,008 patients across 135,609 person-years.

<sup>d</sup>106,128 patients across 254,038 person-years.

<sup>e</sup>105,955 patients across 554,145 person-years.

<sup>f</sup>Analyses by year were conducted without random effects and without year as a covariate because only 1 year was included at a time. Results are not shown for 2008 which was the baseline year to assess preventive care service eligibility.

ARR, adjusted rate ratio
